# Supplementary material
Source: publisher site journal article supplement (https://neobiota.pensoft.net/article/59181/download/suppl/32/)

## Supplementary material 2

**Figure S1. Description of economic cost of IAS for non-robust data (n = 90 raw entries, 221 expanded entries).**

(a) Total economic costs (outer circles) and number of entries (inner circles) for invasive species in Spain for each cost descriptor: taxonomy, environment, protection, economic sector and type of cost. (b) Temporal trends of the economic costs (US\$). Each point represents the cumulative cost for a given year, whereas its size is proportional to the number of estimates for that particular year. Average annual costs are calculated in 4-year periods and are represented by black dots and horizontal solid lines. Dashed lines connect the average annual costs for these 4-year periods.

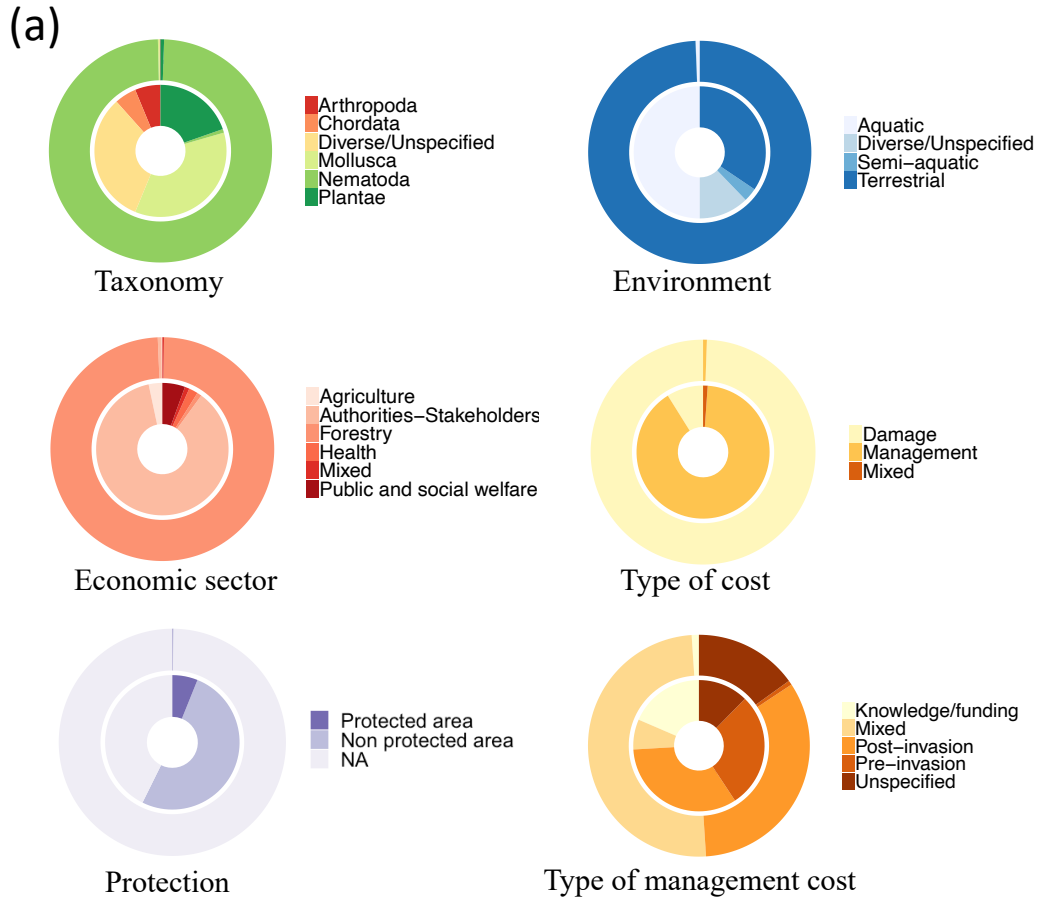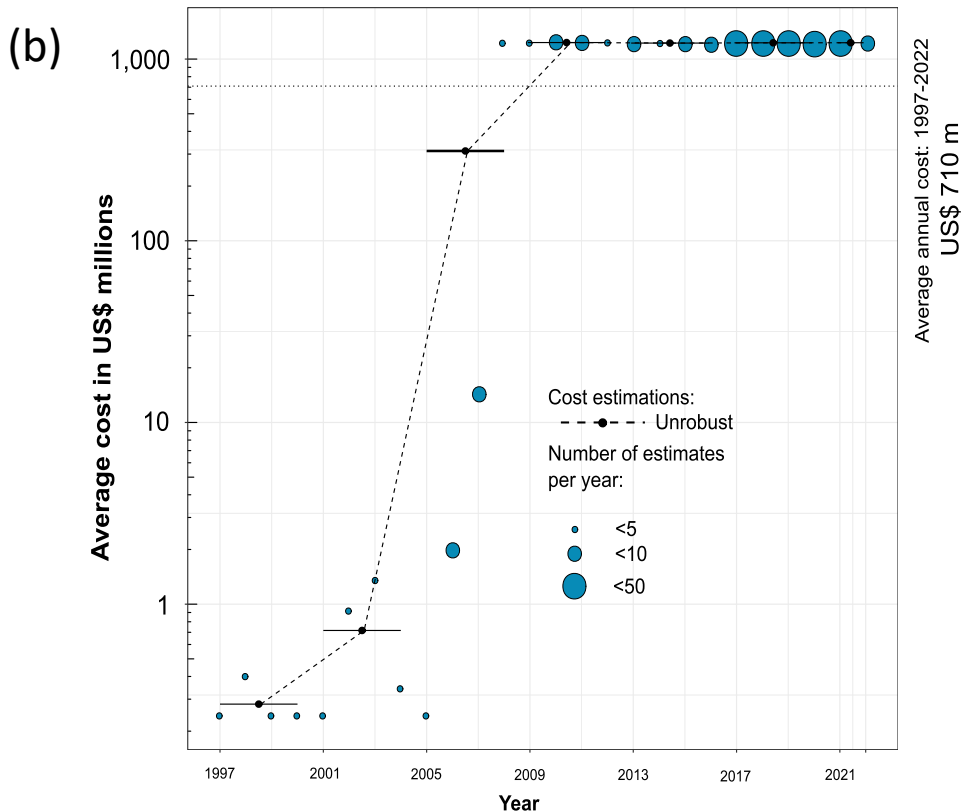

Supplement: Supplementary file 1
